# Supplementary material for: Fluorometric assay of cyanophoric pyrethroids based on benzothiazole modified carbon quantum dots
Source: Royal Society of Chemistry journal article supplement (doi:10.1039/d3nj00465a), 2023-01-01
Supplement: d3nj00465a6.pdf [file d3nj00465a6.pdf]

## Supporting Information

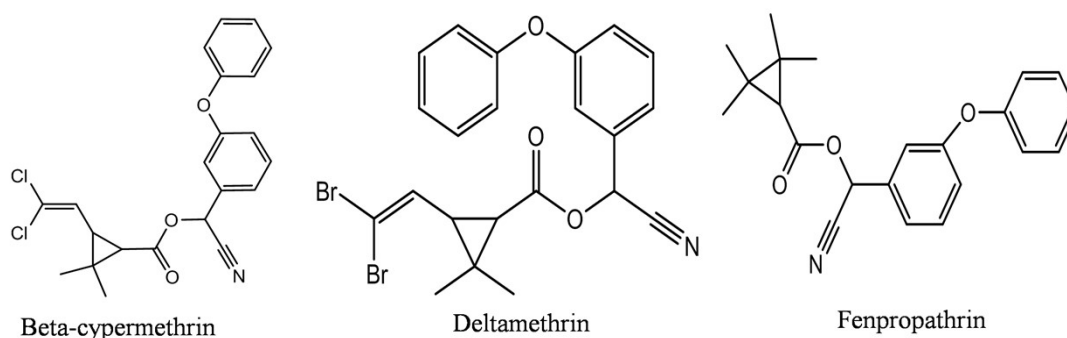

Figure S1 The molecular structures of cypermethrin, deltamethrin and fenpropathrin

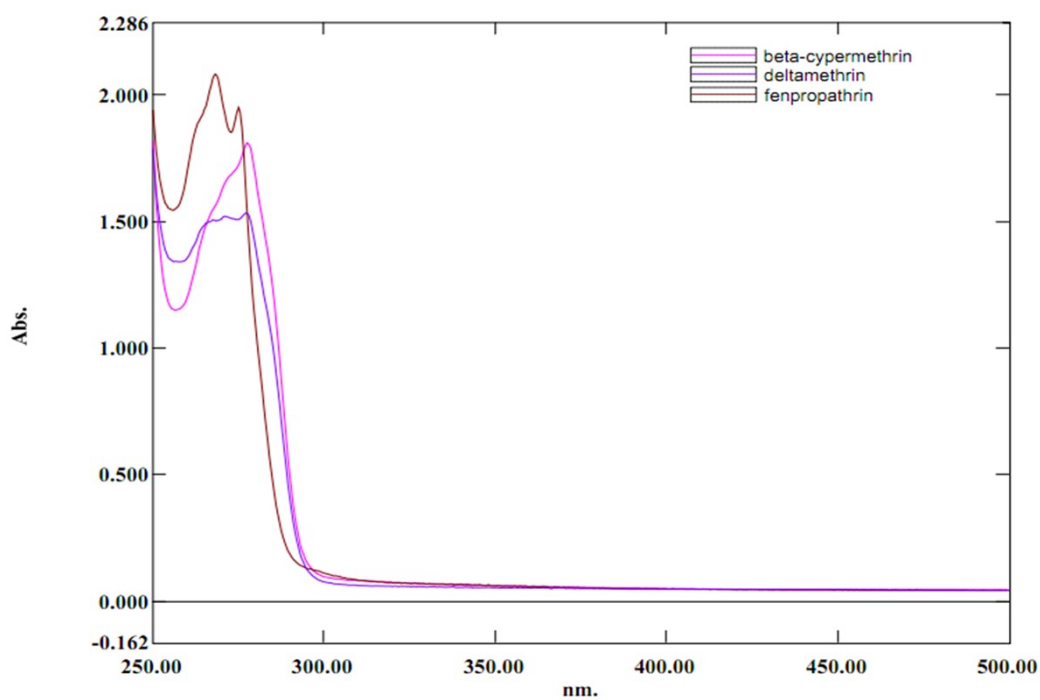

Figure S2 UV-vis absorption spectra of cypermethrin, deltamethrin and fenpropathrin ( $1 \text{ mg mL}^{-1}$ )

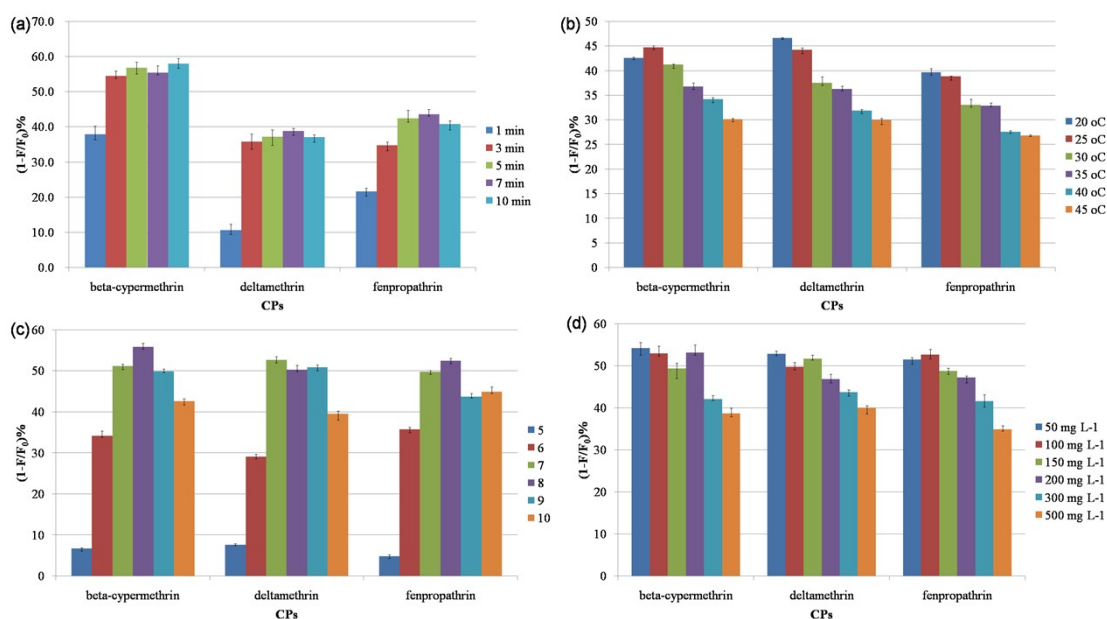

Figure S3 Optimization of experimental conditions. reaction time (a), reaction temperature (b), pH value (c) and concentration of benzothiazole-CDs (d) (n=5)

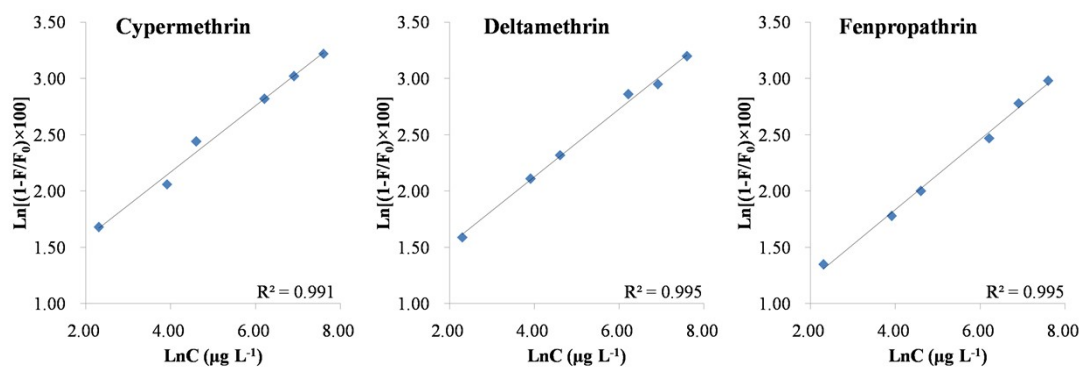

Figure S4 The standard curves of the relationship between CPs concentration and fluorescence intensity
