# Supplementary figures and images for: Fluorometric assay of cyanophoric pyrethroids based on benzothiazole modified carbon quantum dots
Source: Royal Society of Chemistry journal article supplement (doi:10.1039/d3nj00465a), 2023-01-01

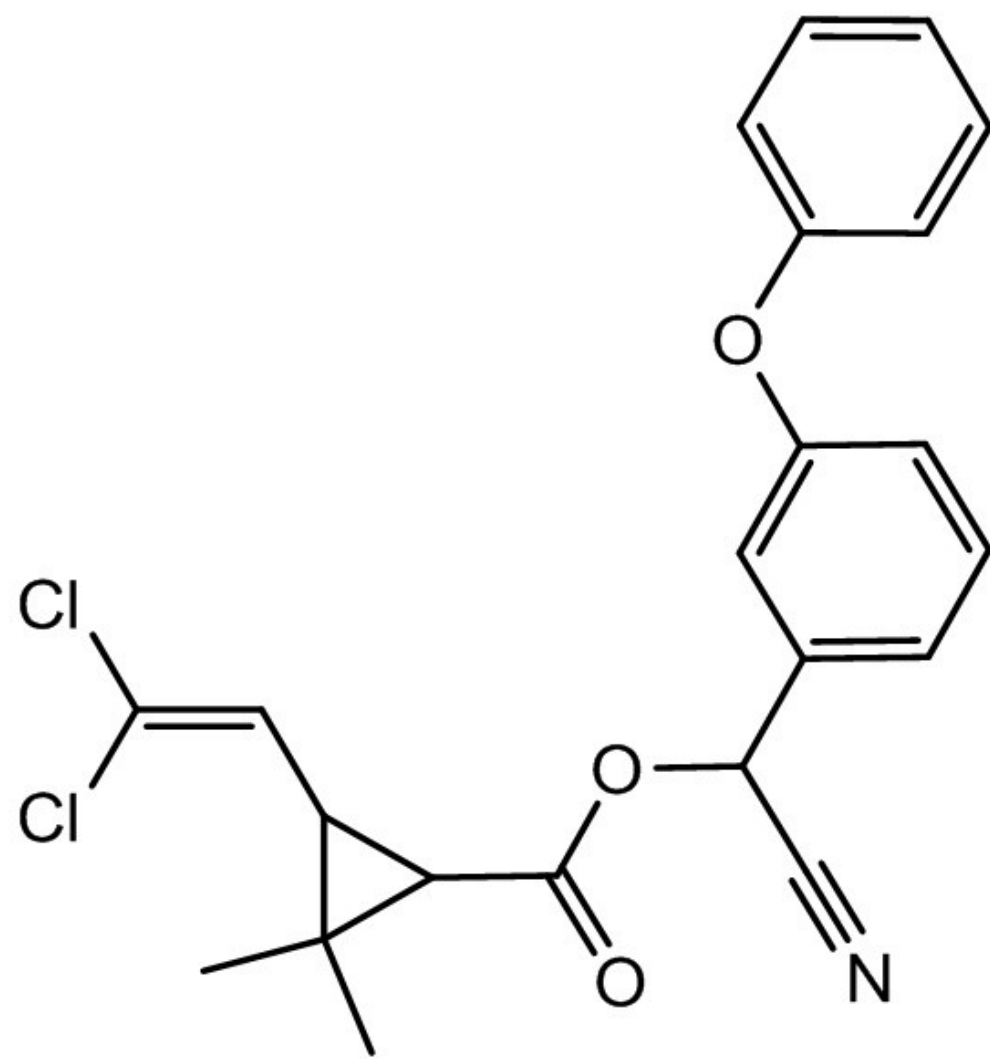

Beta-cypermethrin

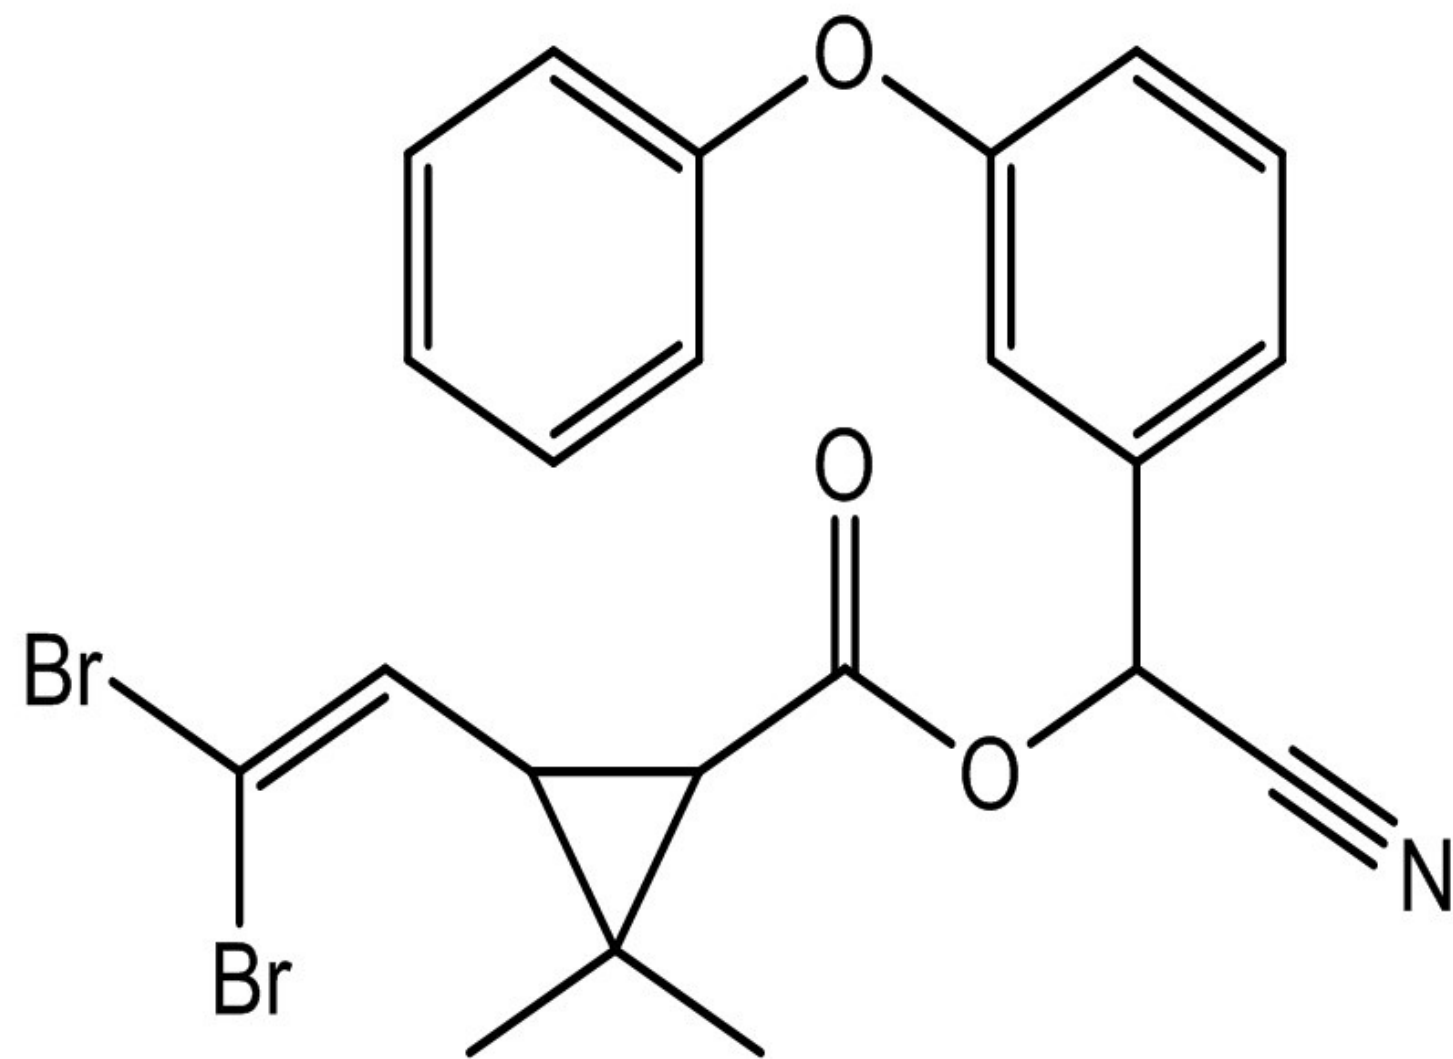

Deltamethrin

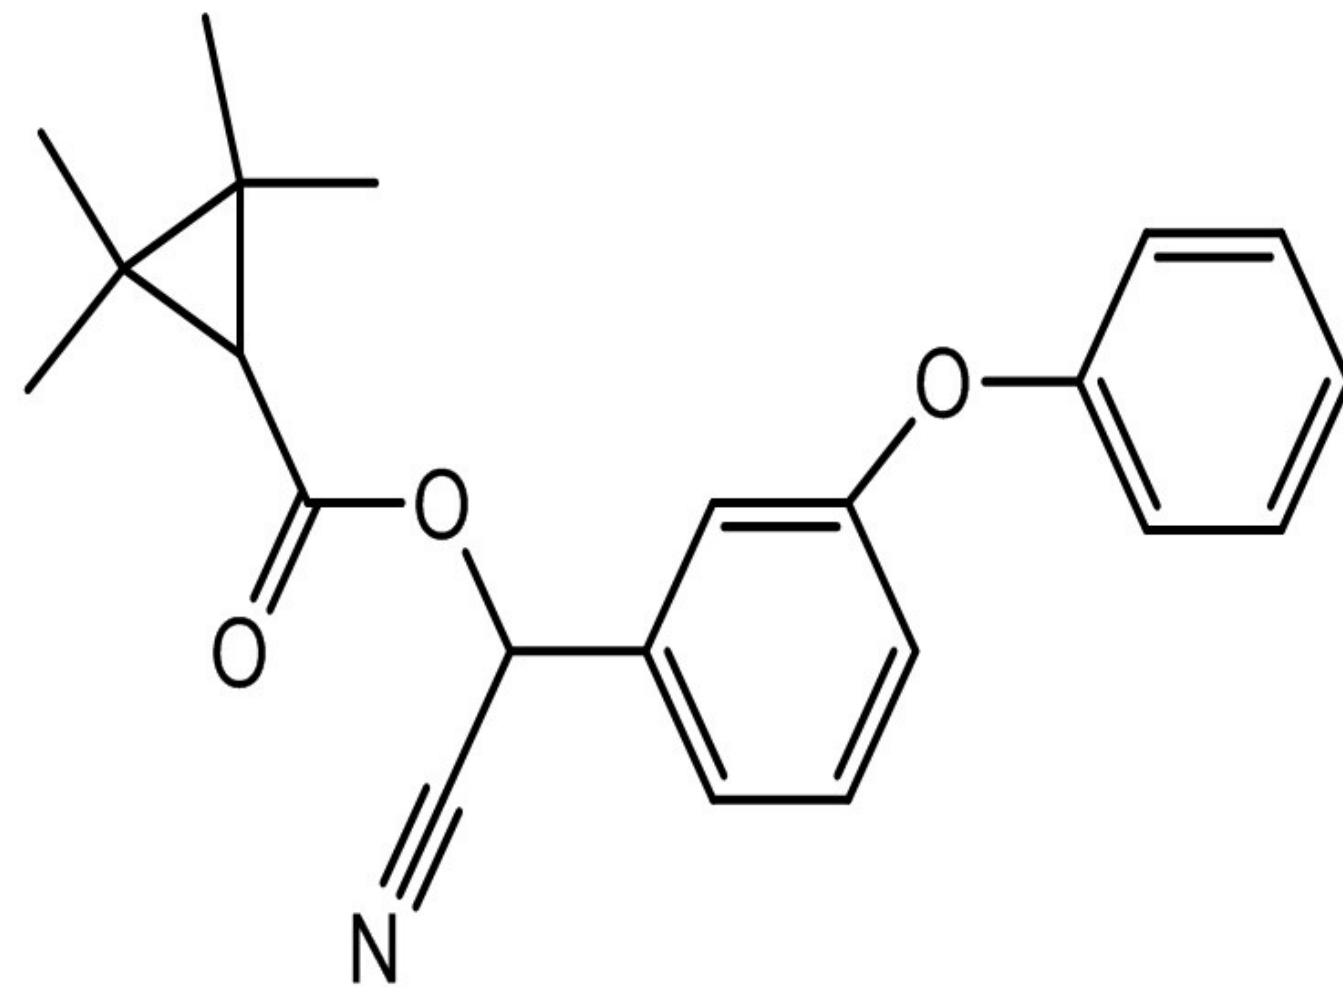

Fenpropathrin

Supplement: d3nj00465a2.pdf [file d3nj00465a2.pdf]

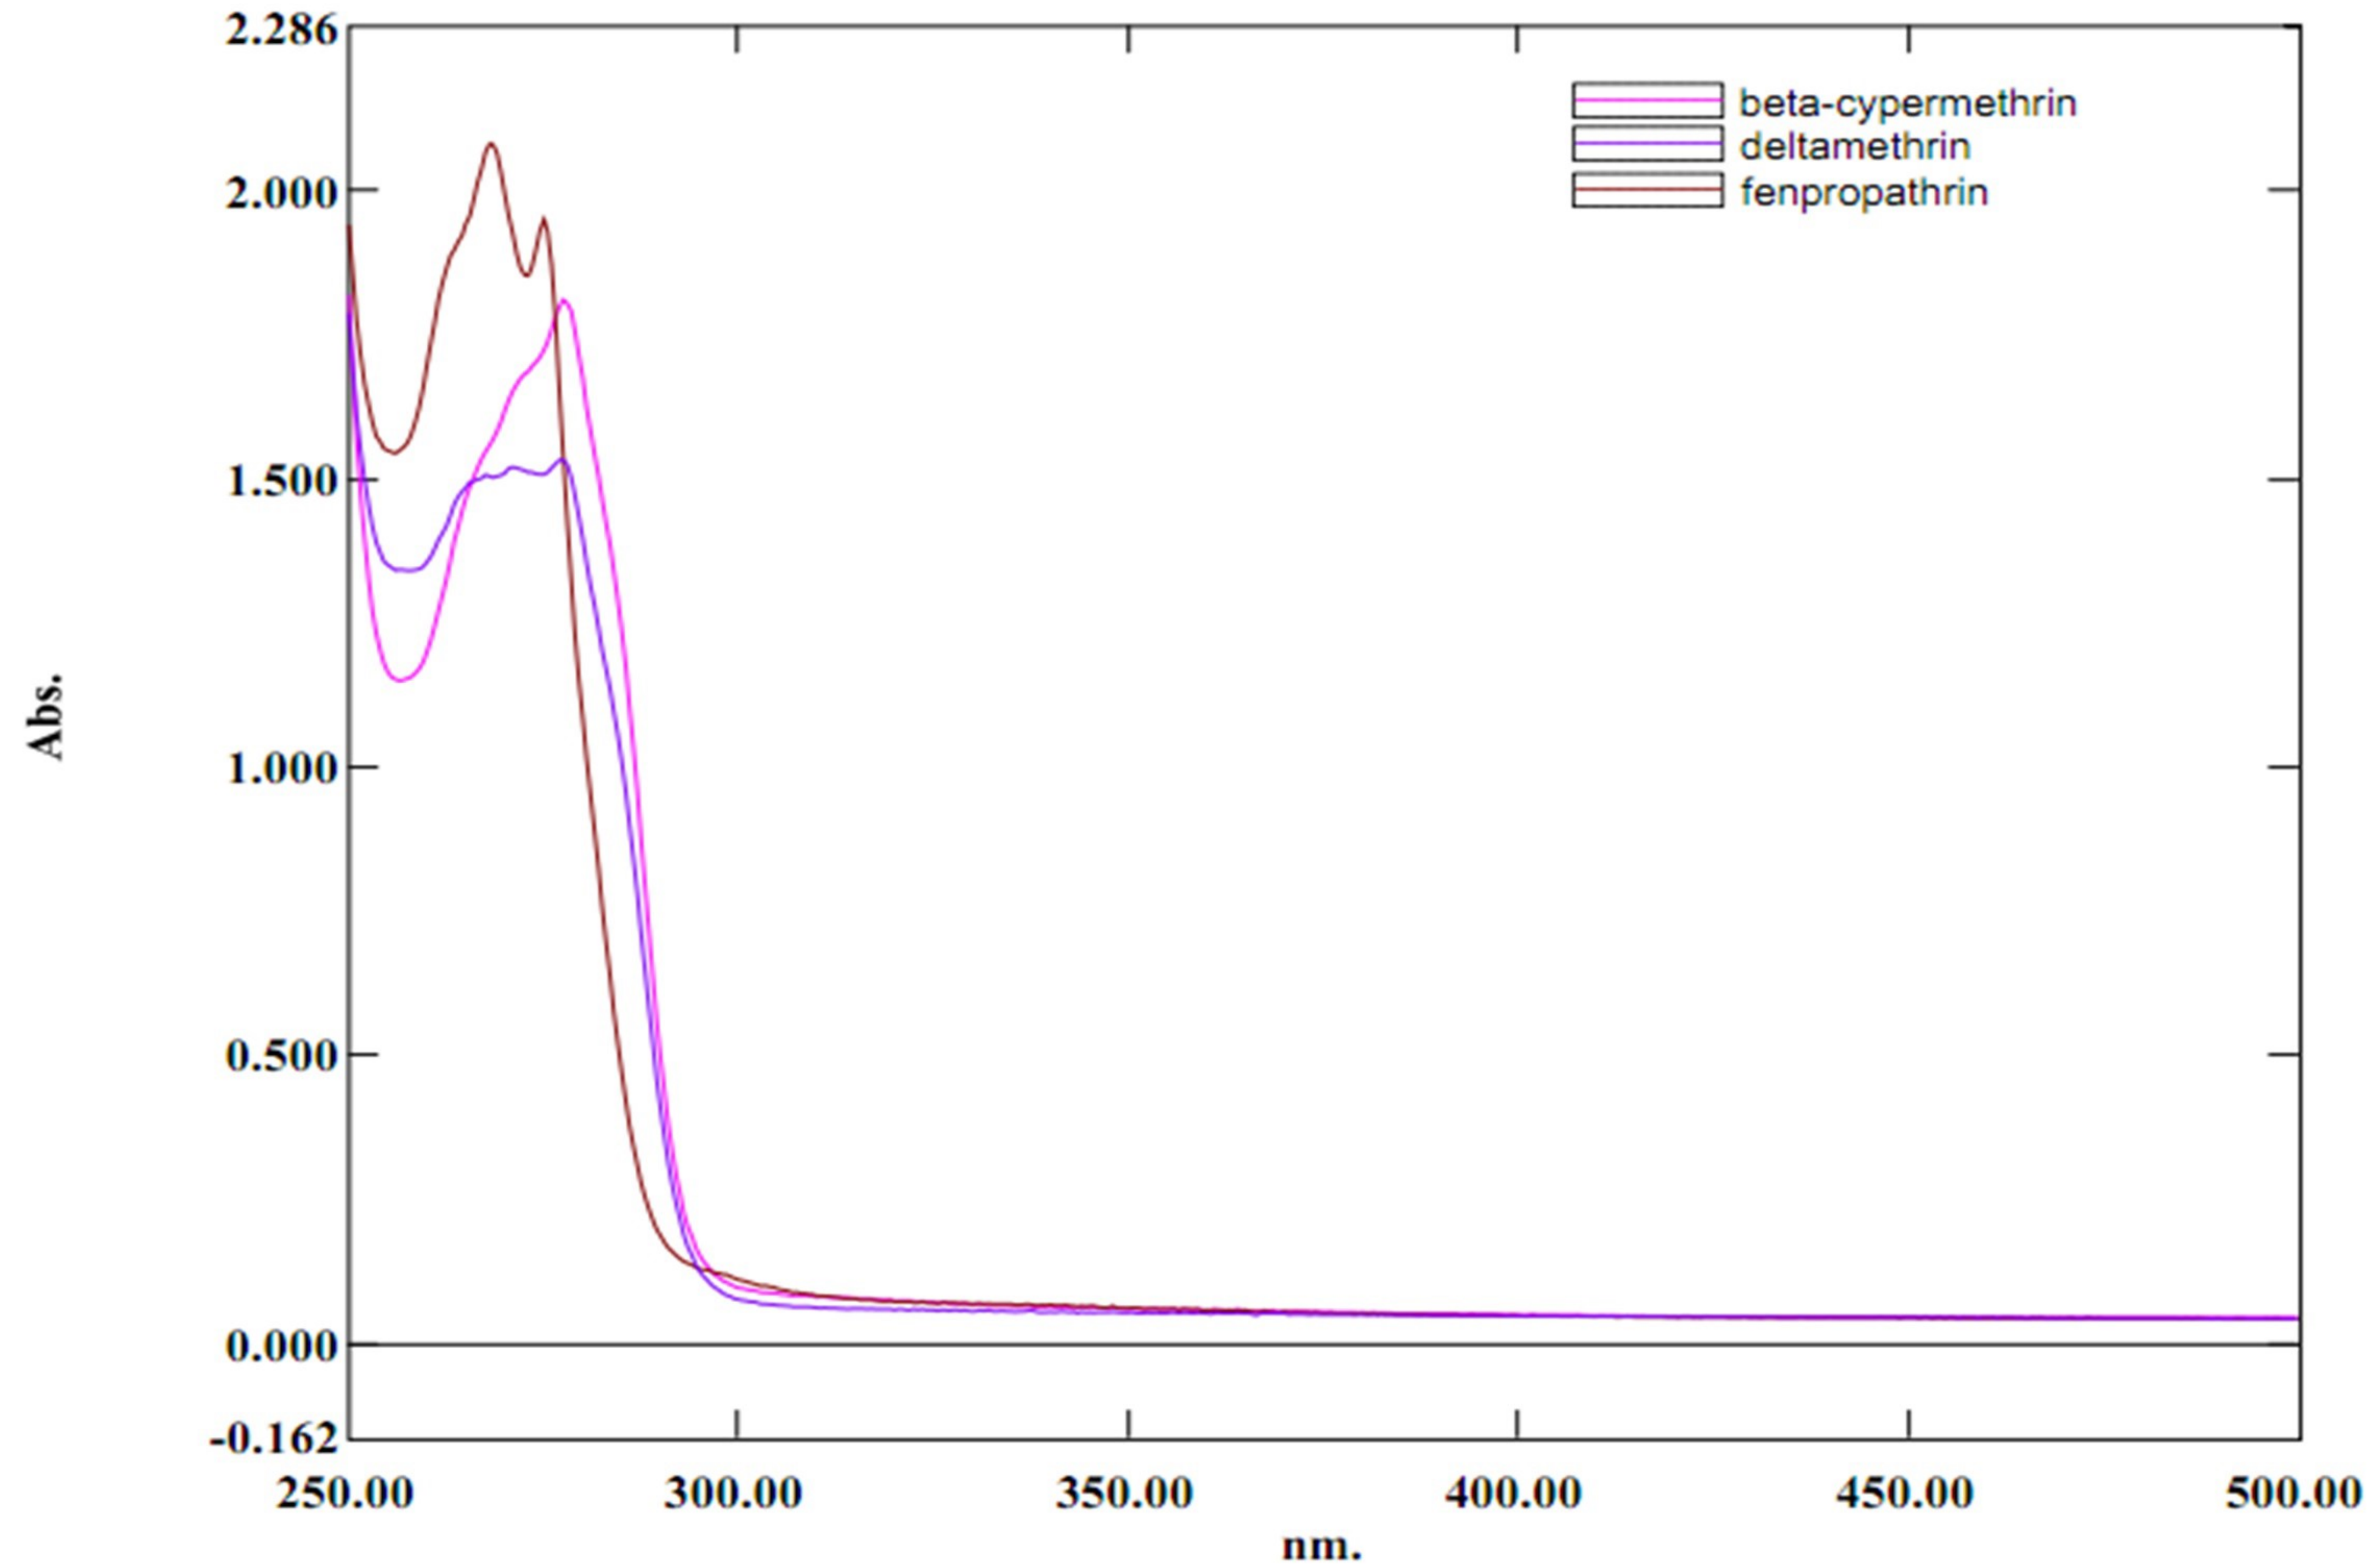

Supplement: d3nj00465a3.pdf [file d3nj00465a3.pdf]

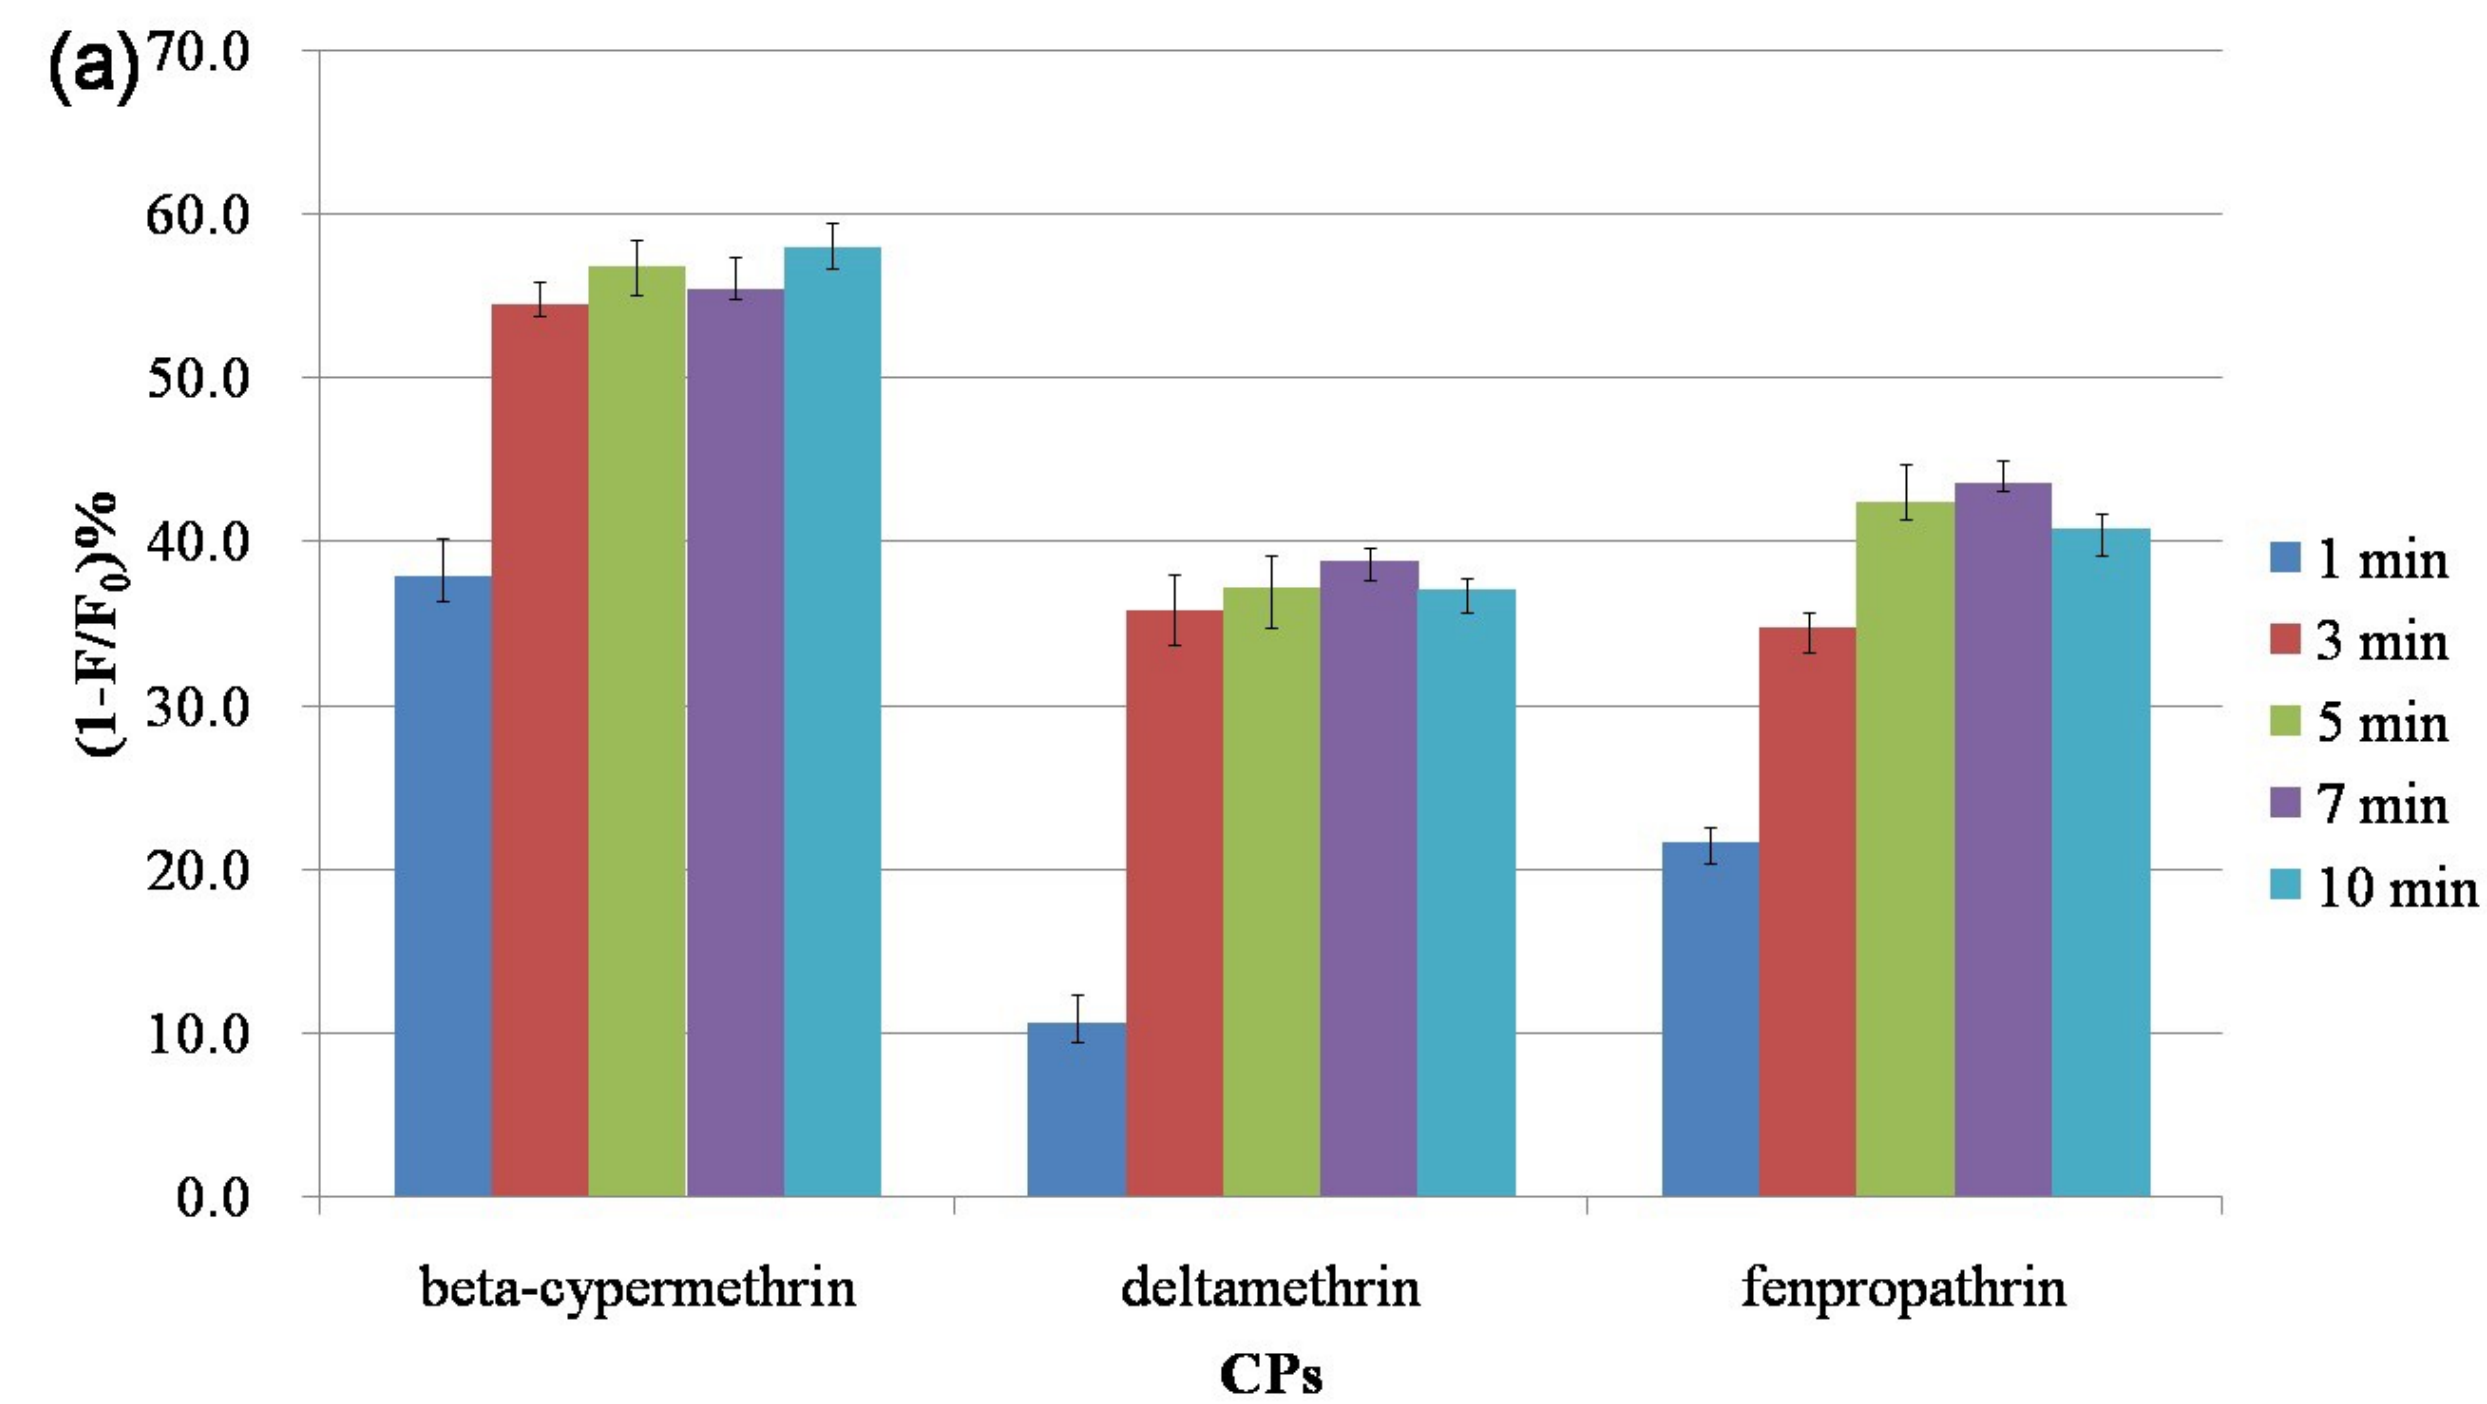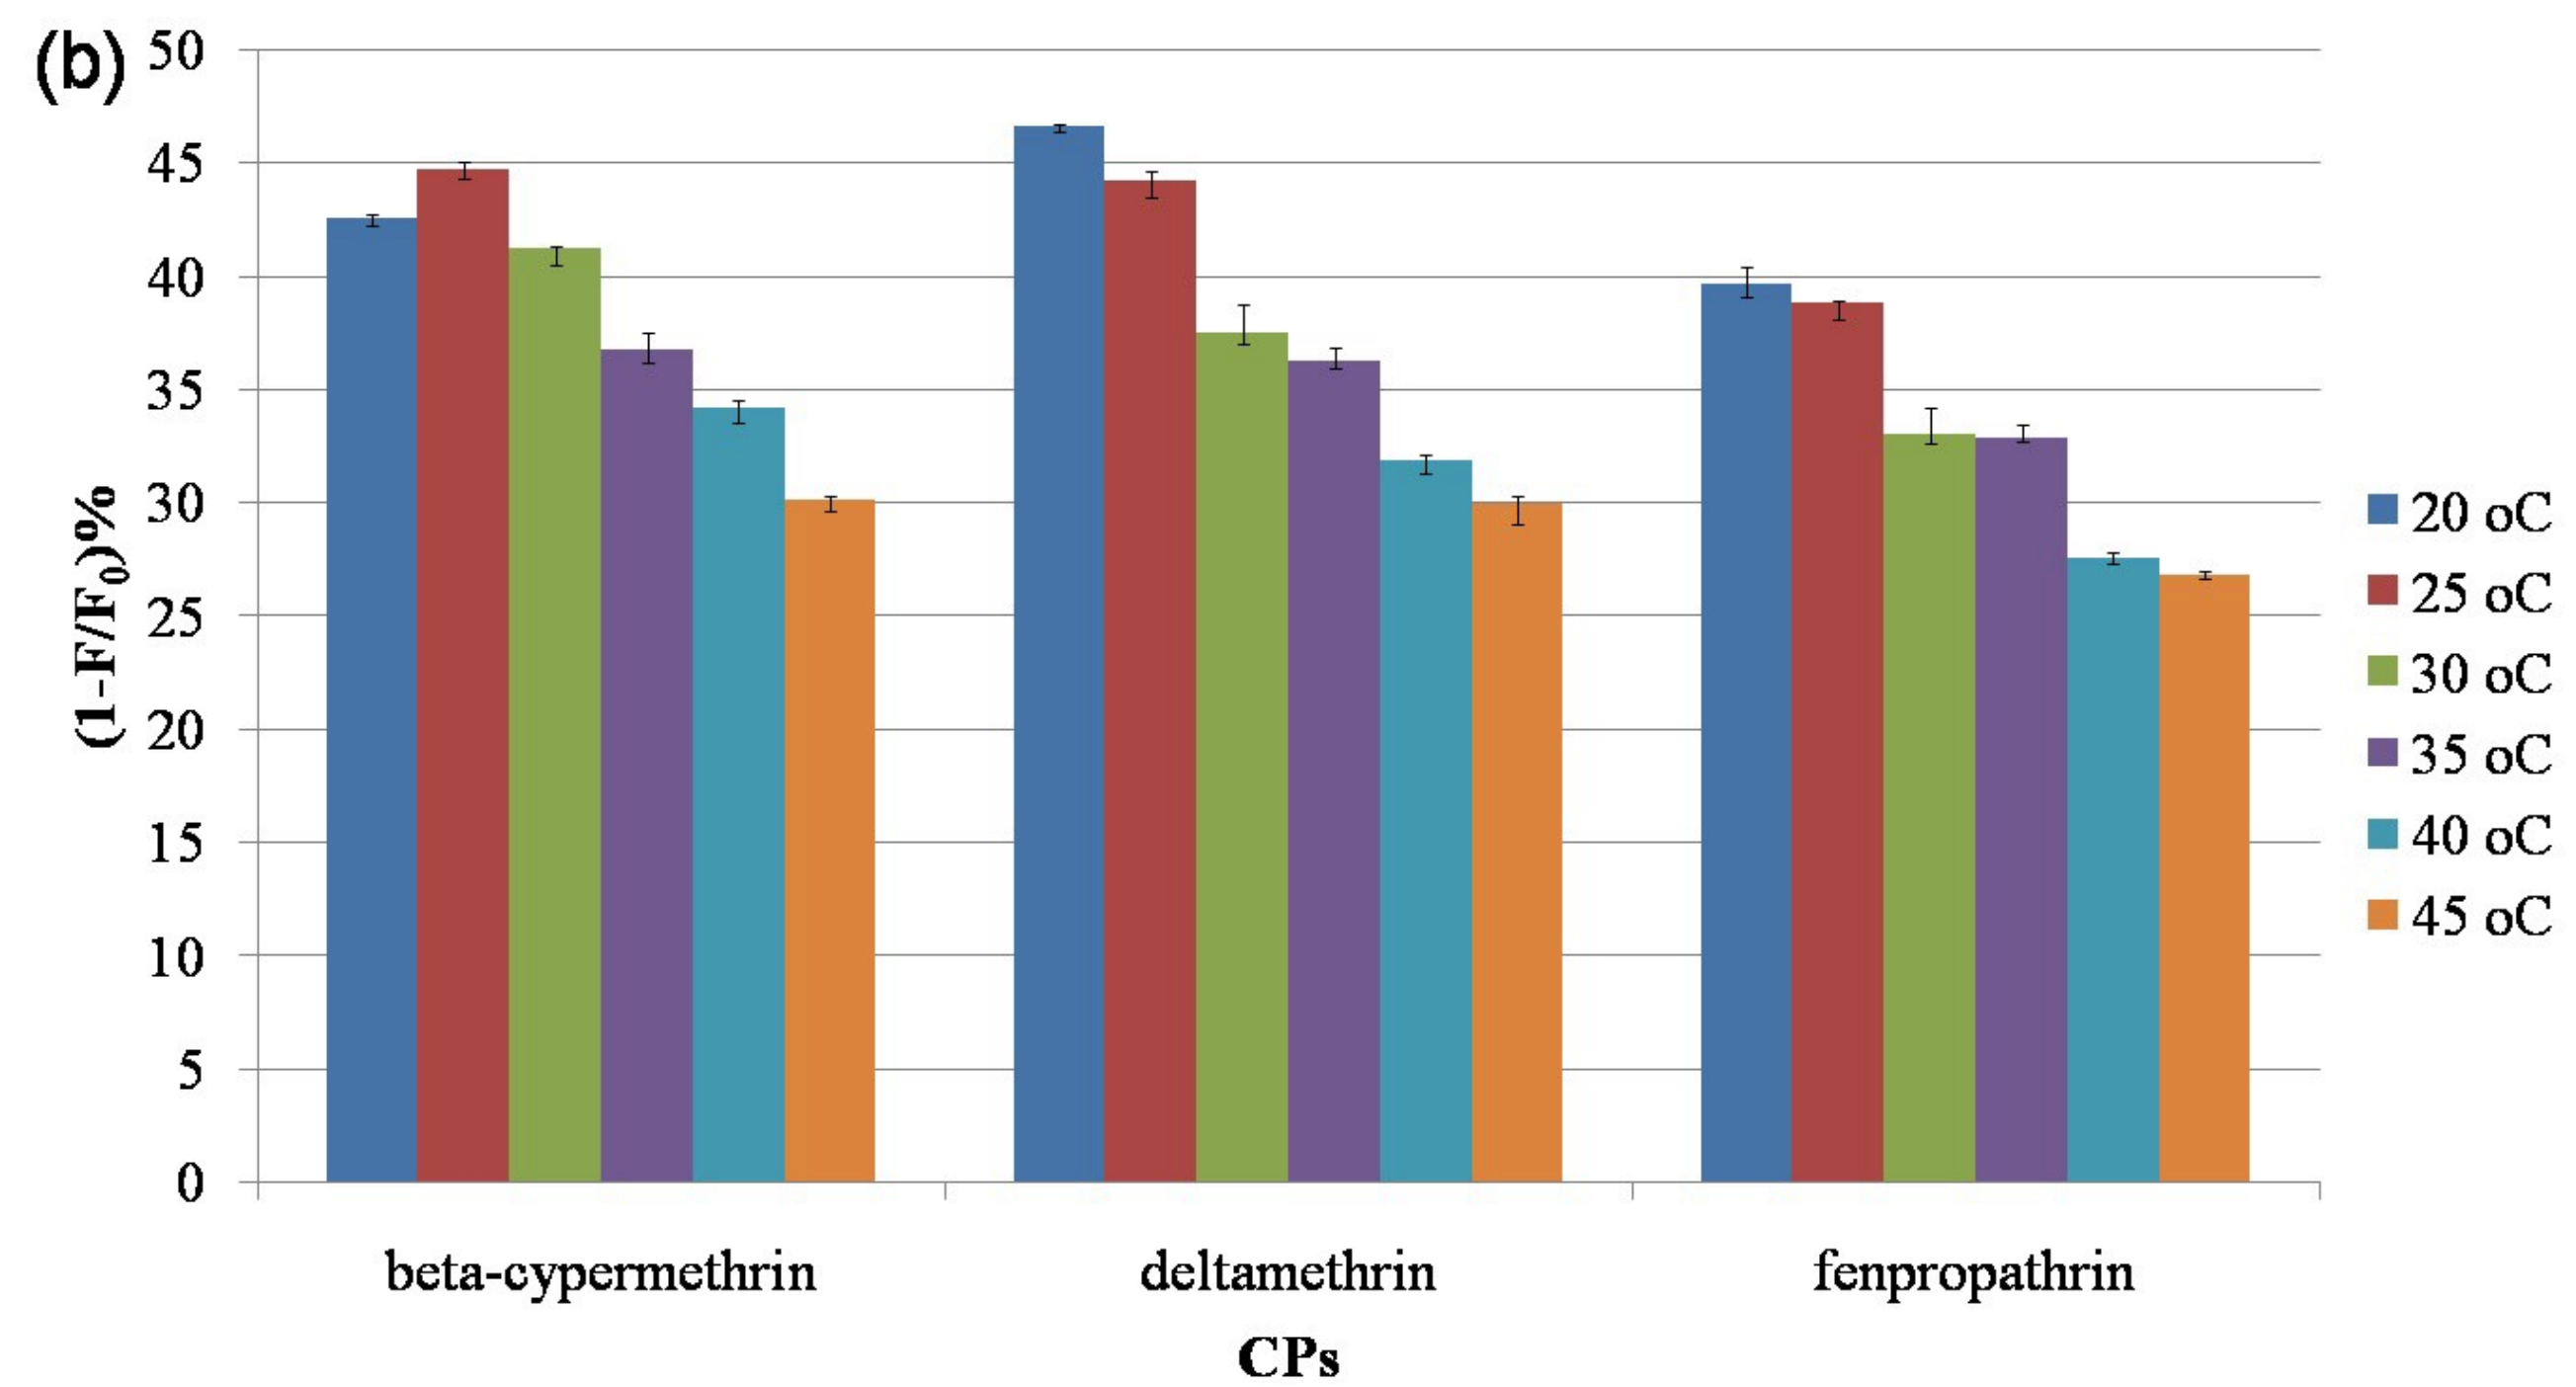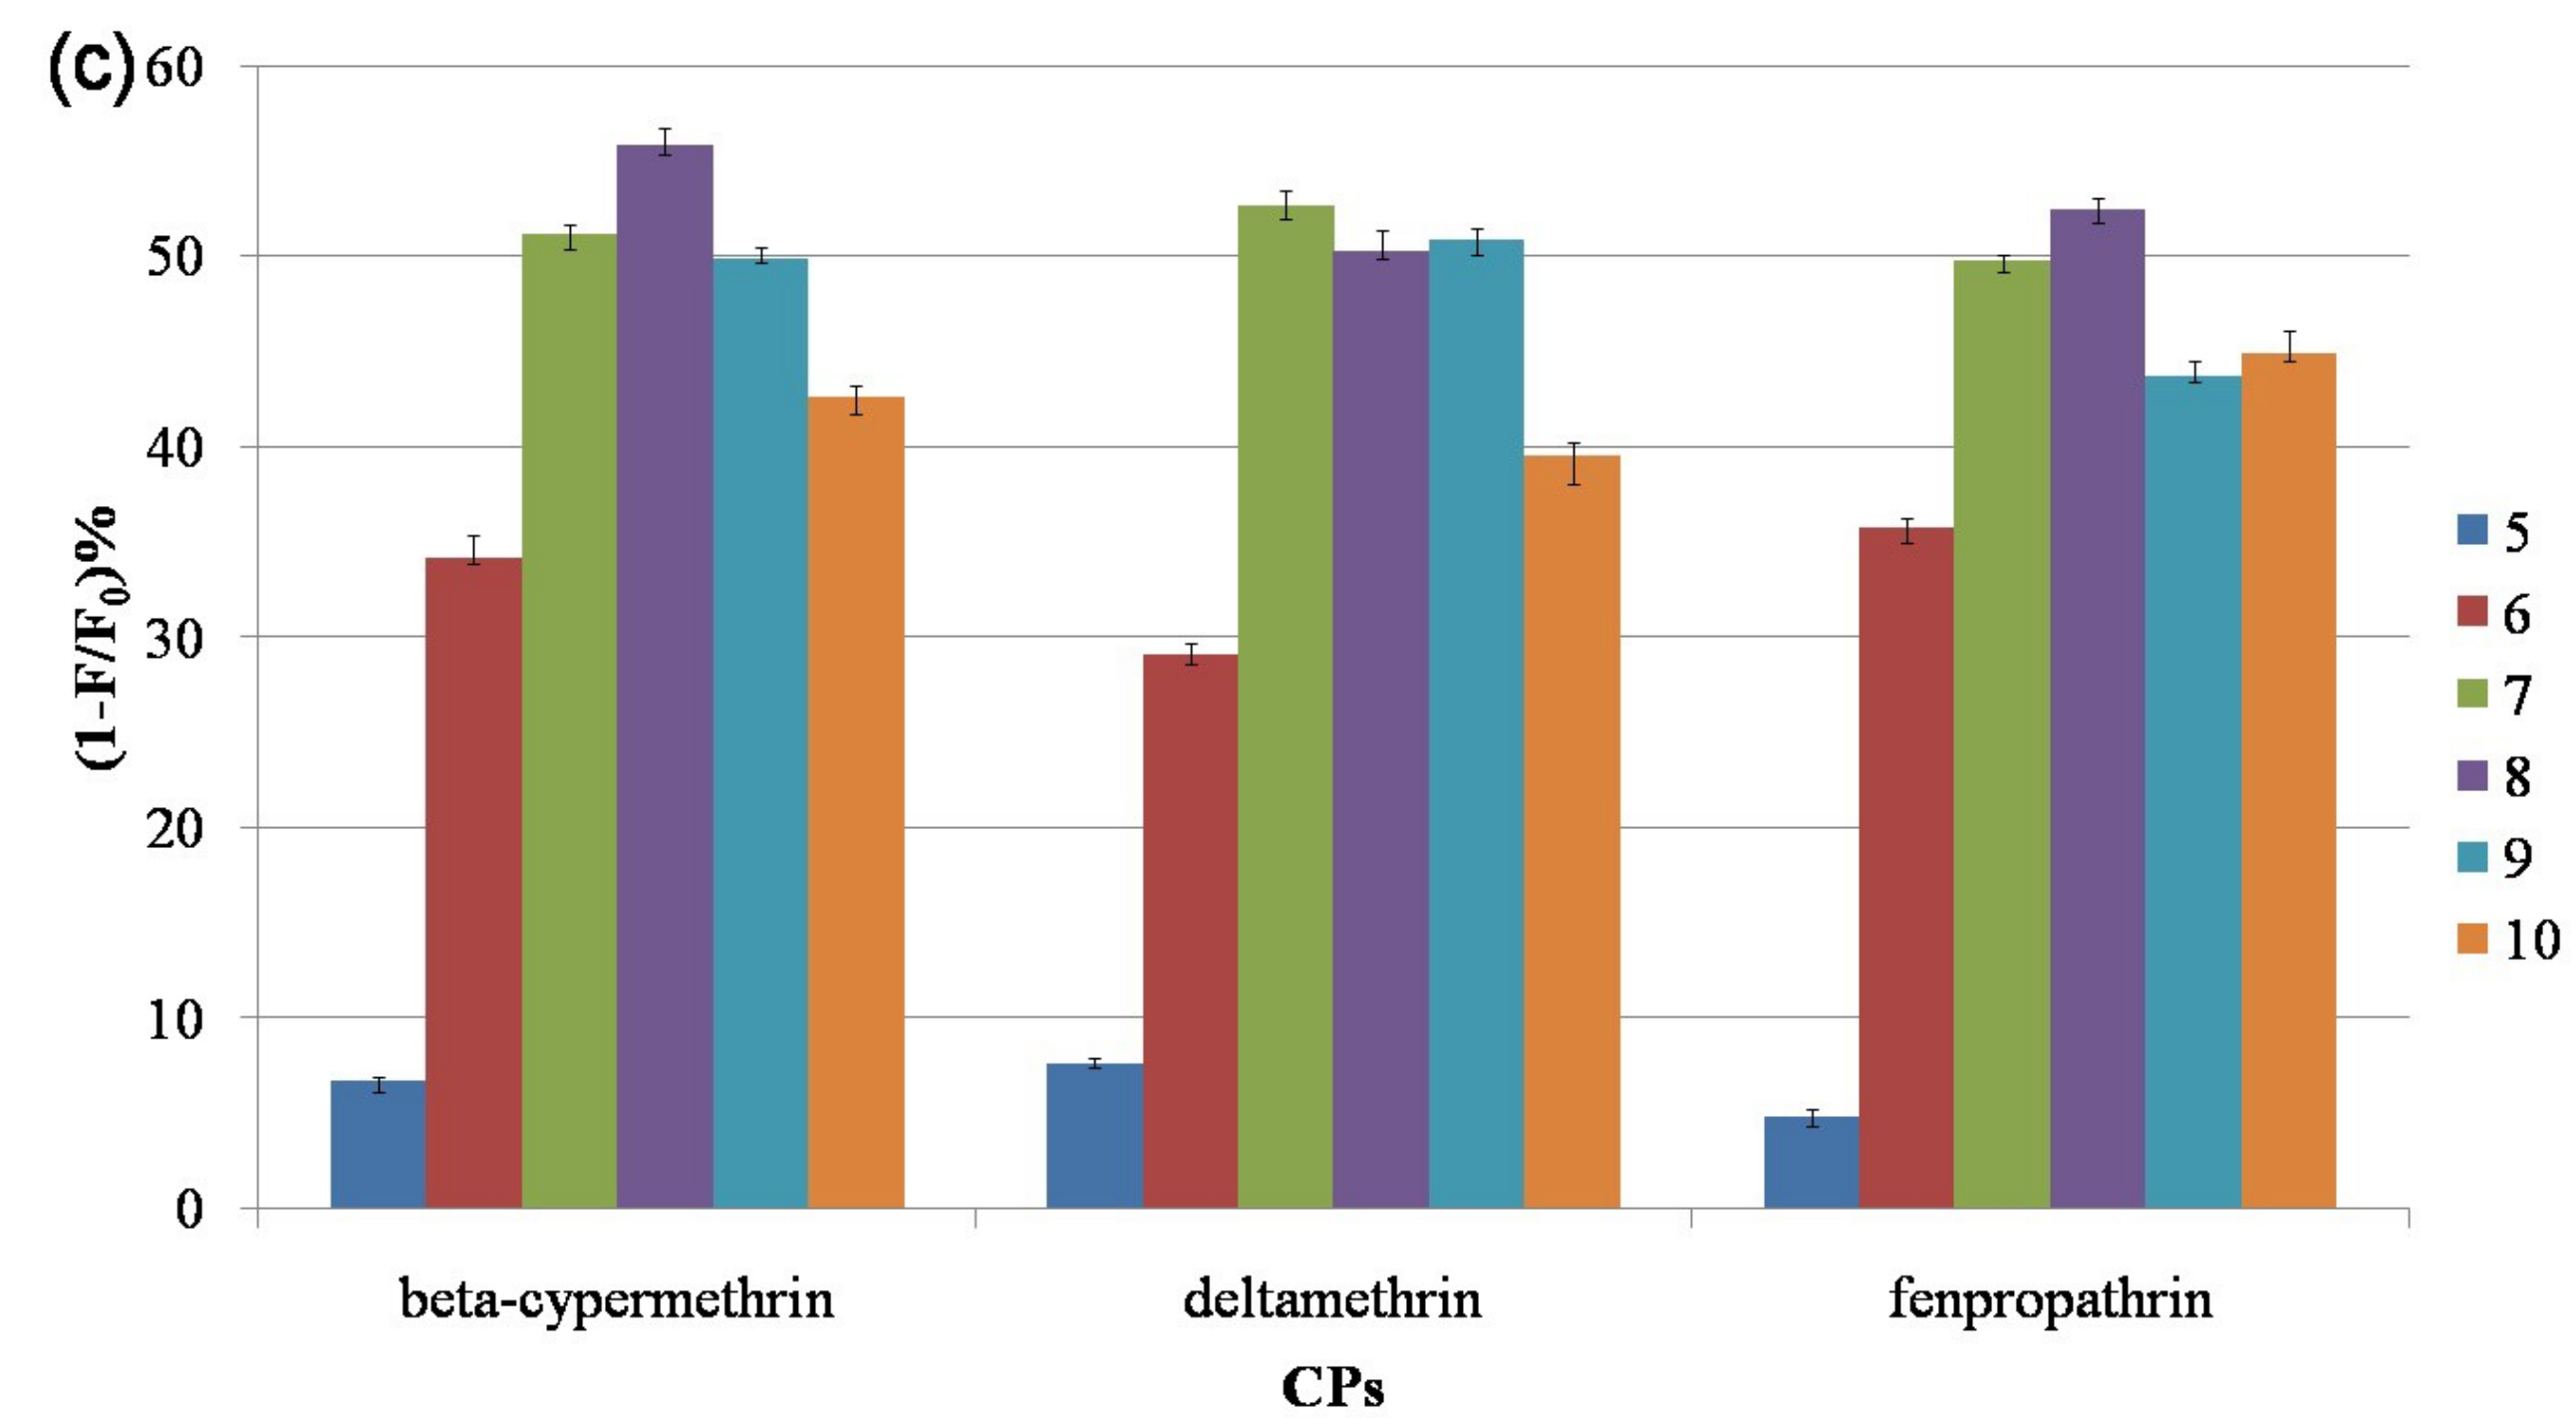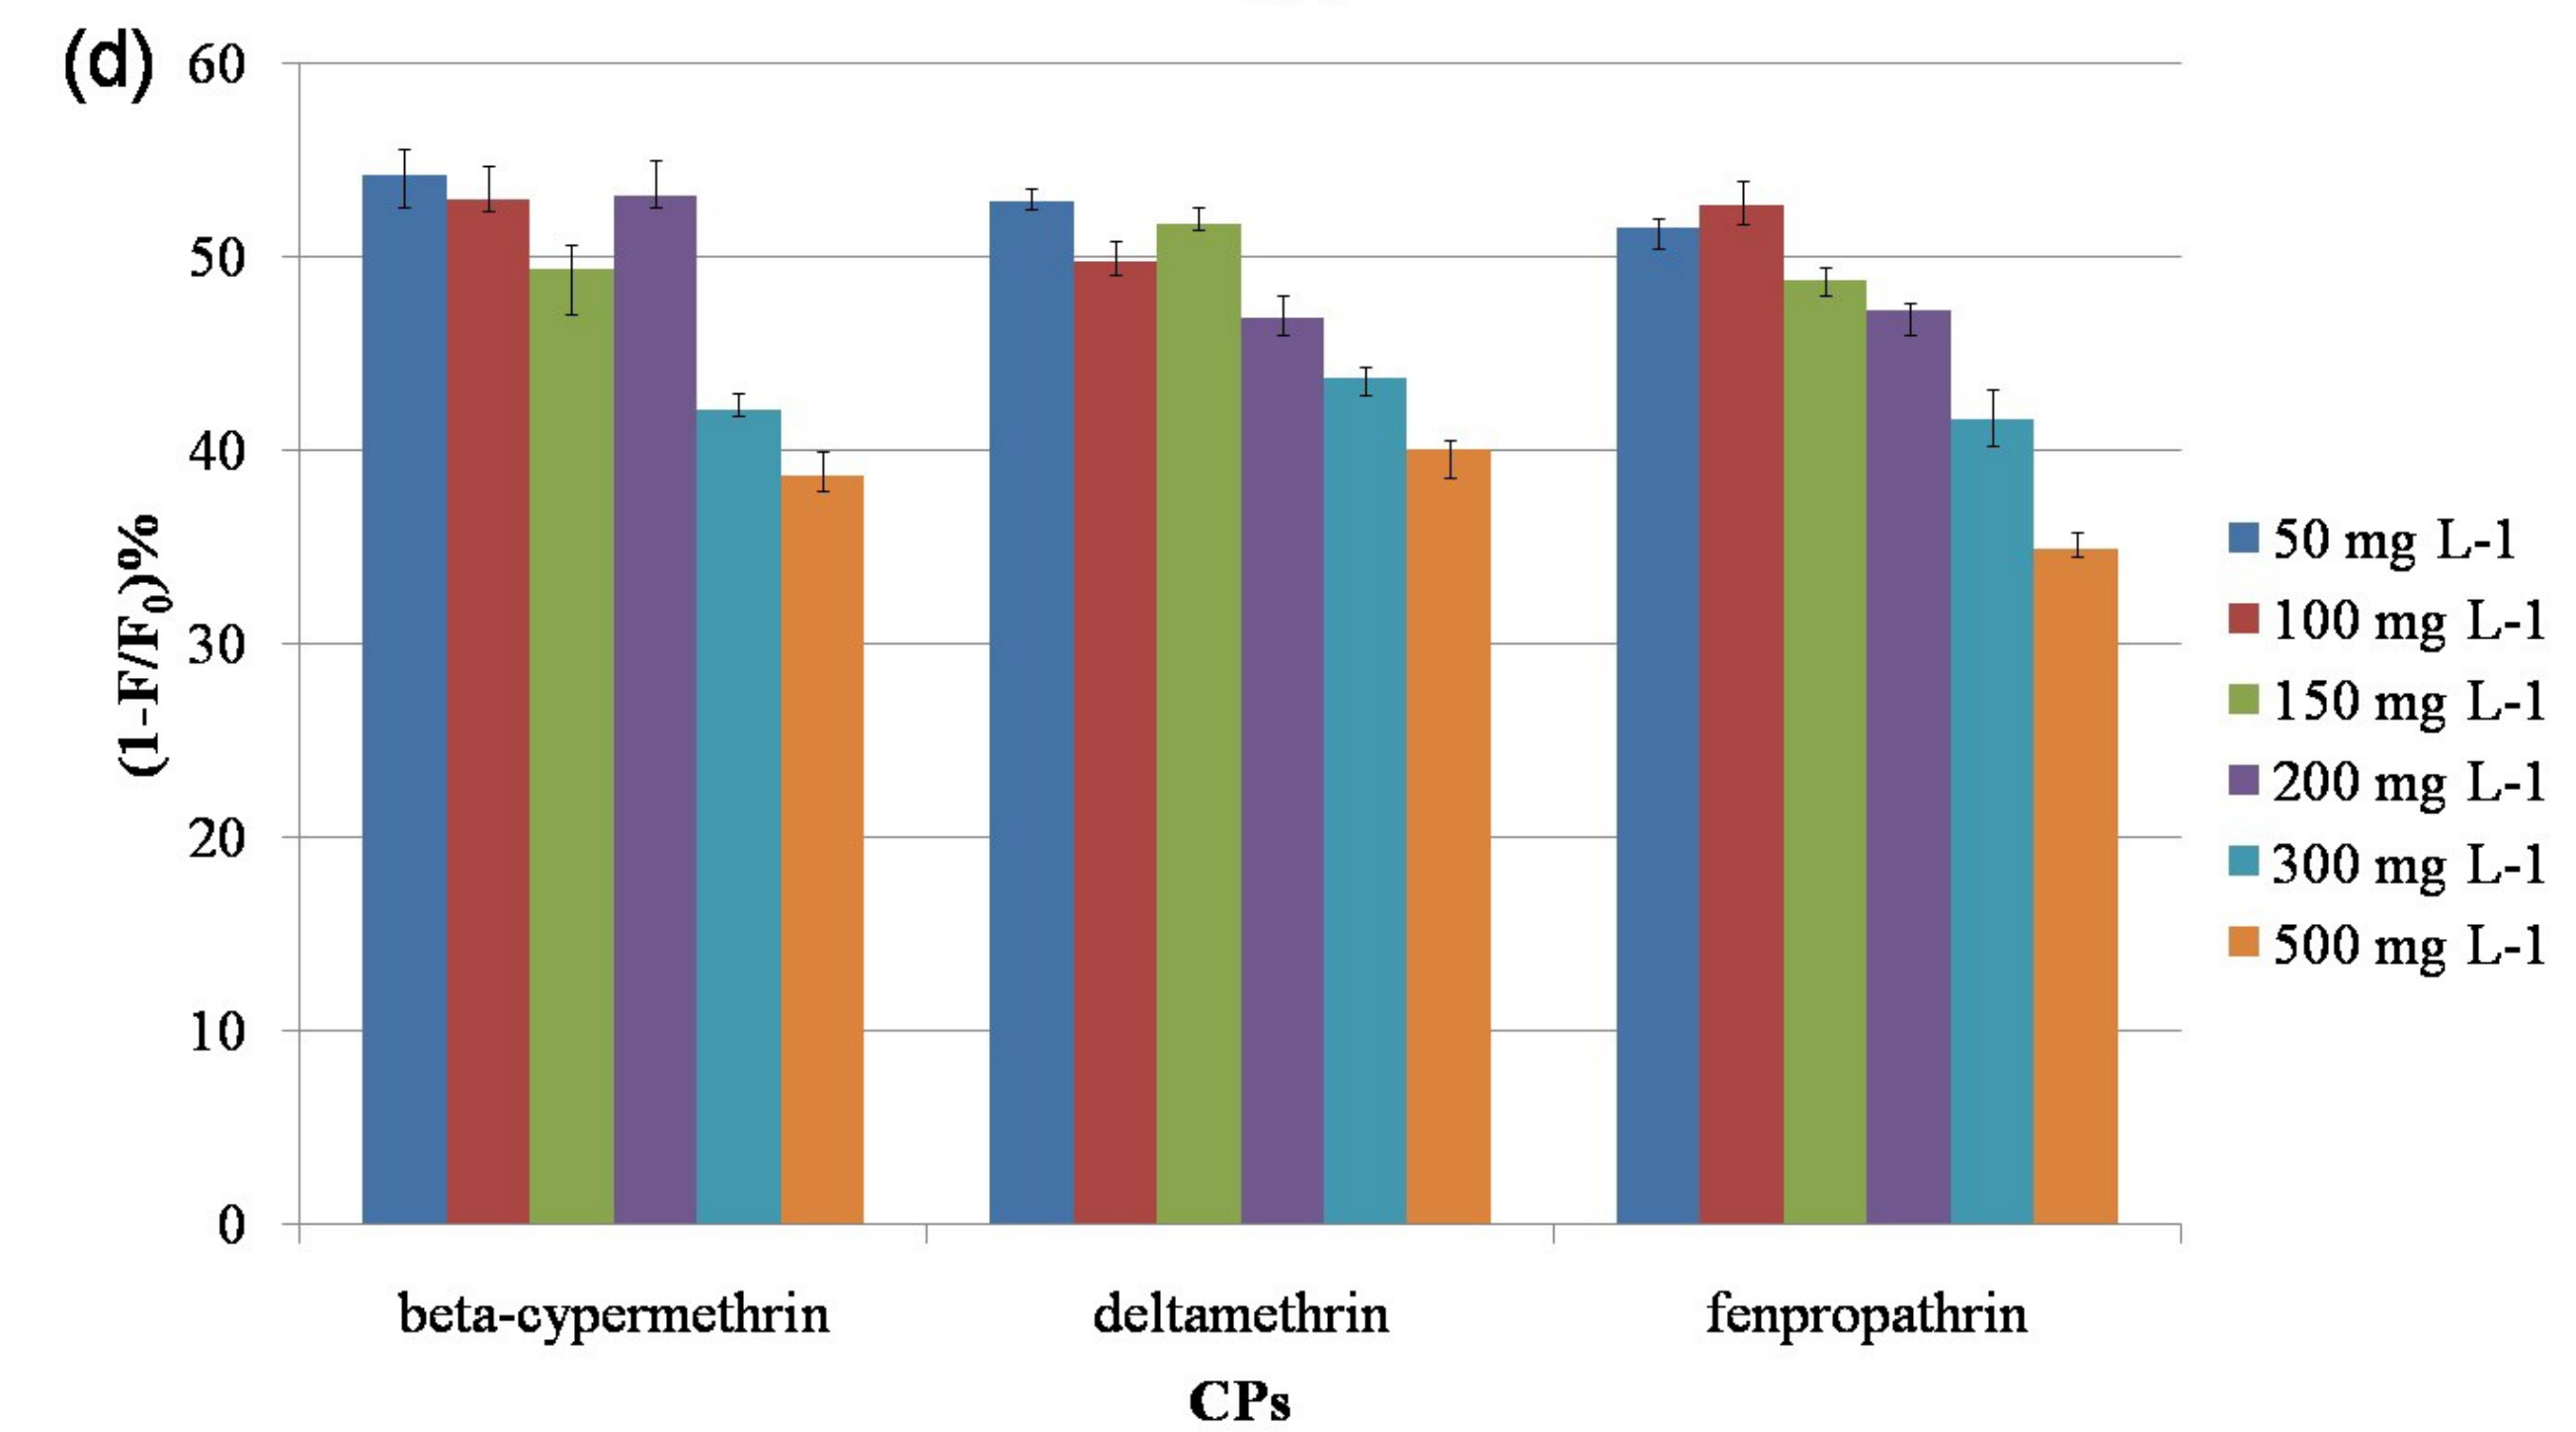

Supplement: d3nj00465a4.pdf [file d3nj00465a4.pdf]

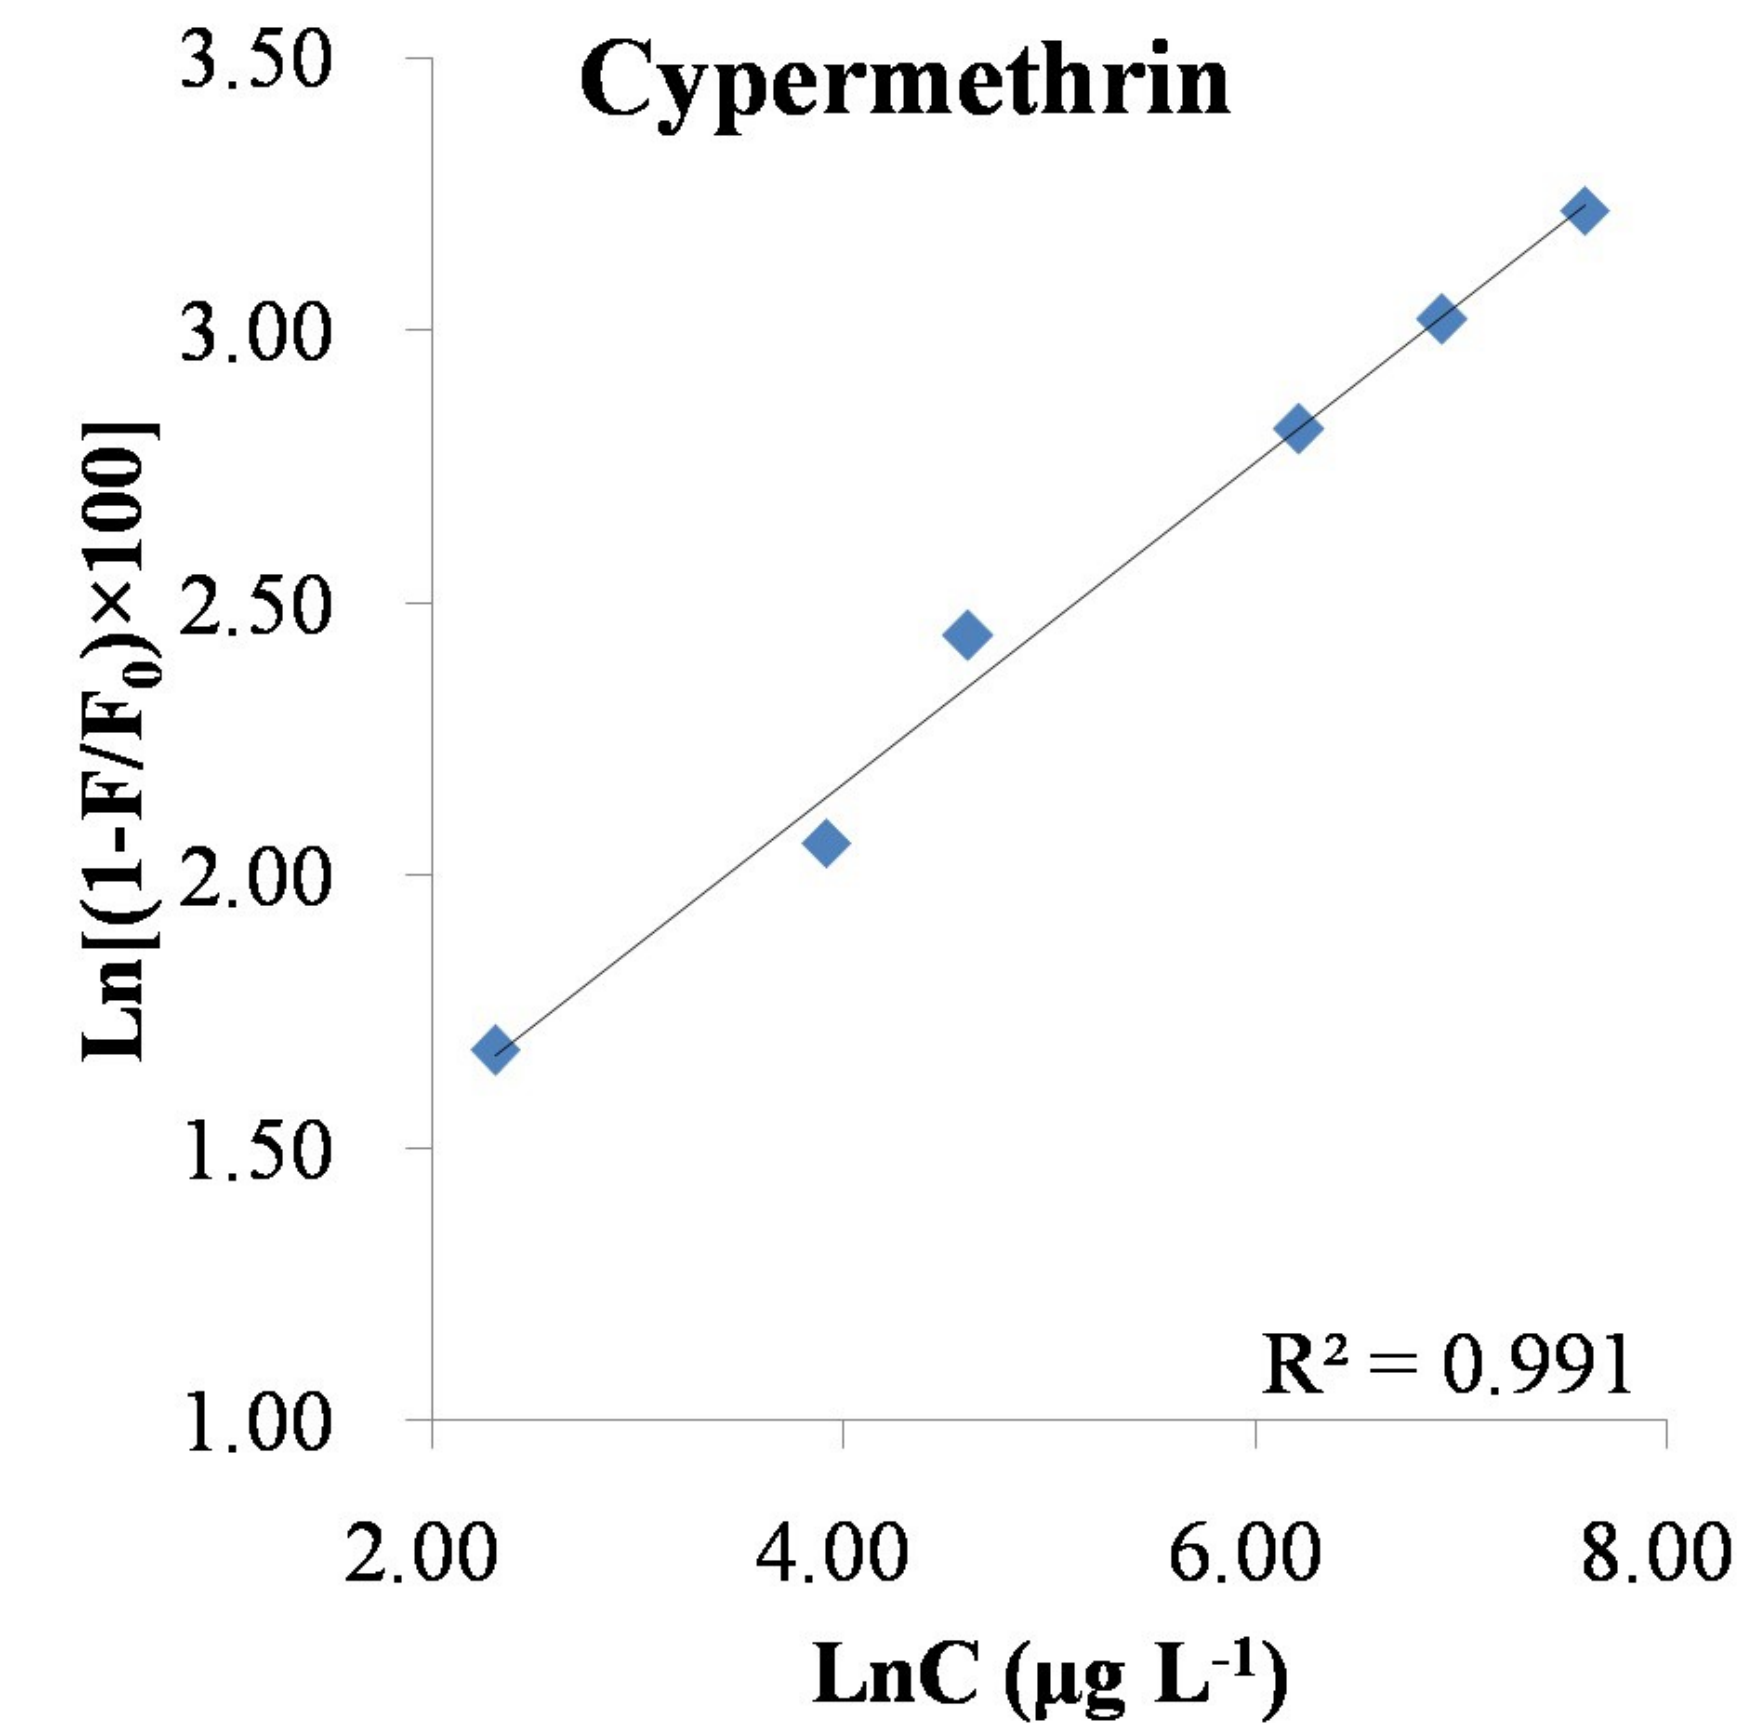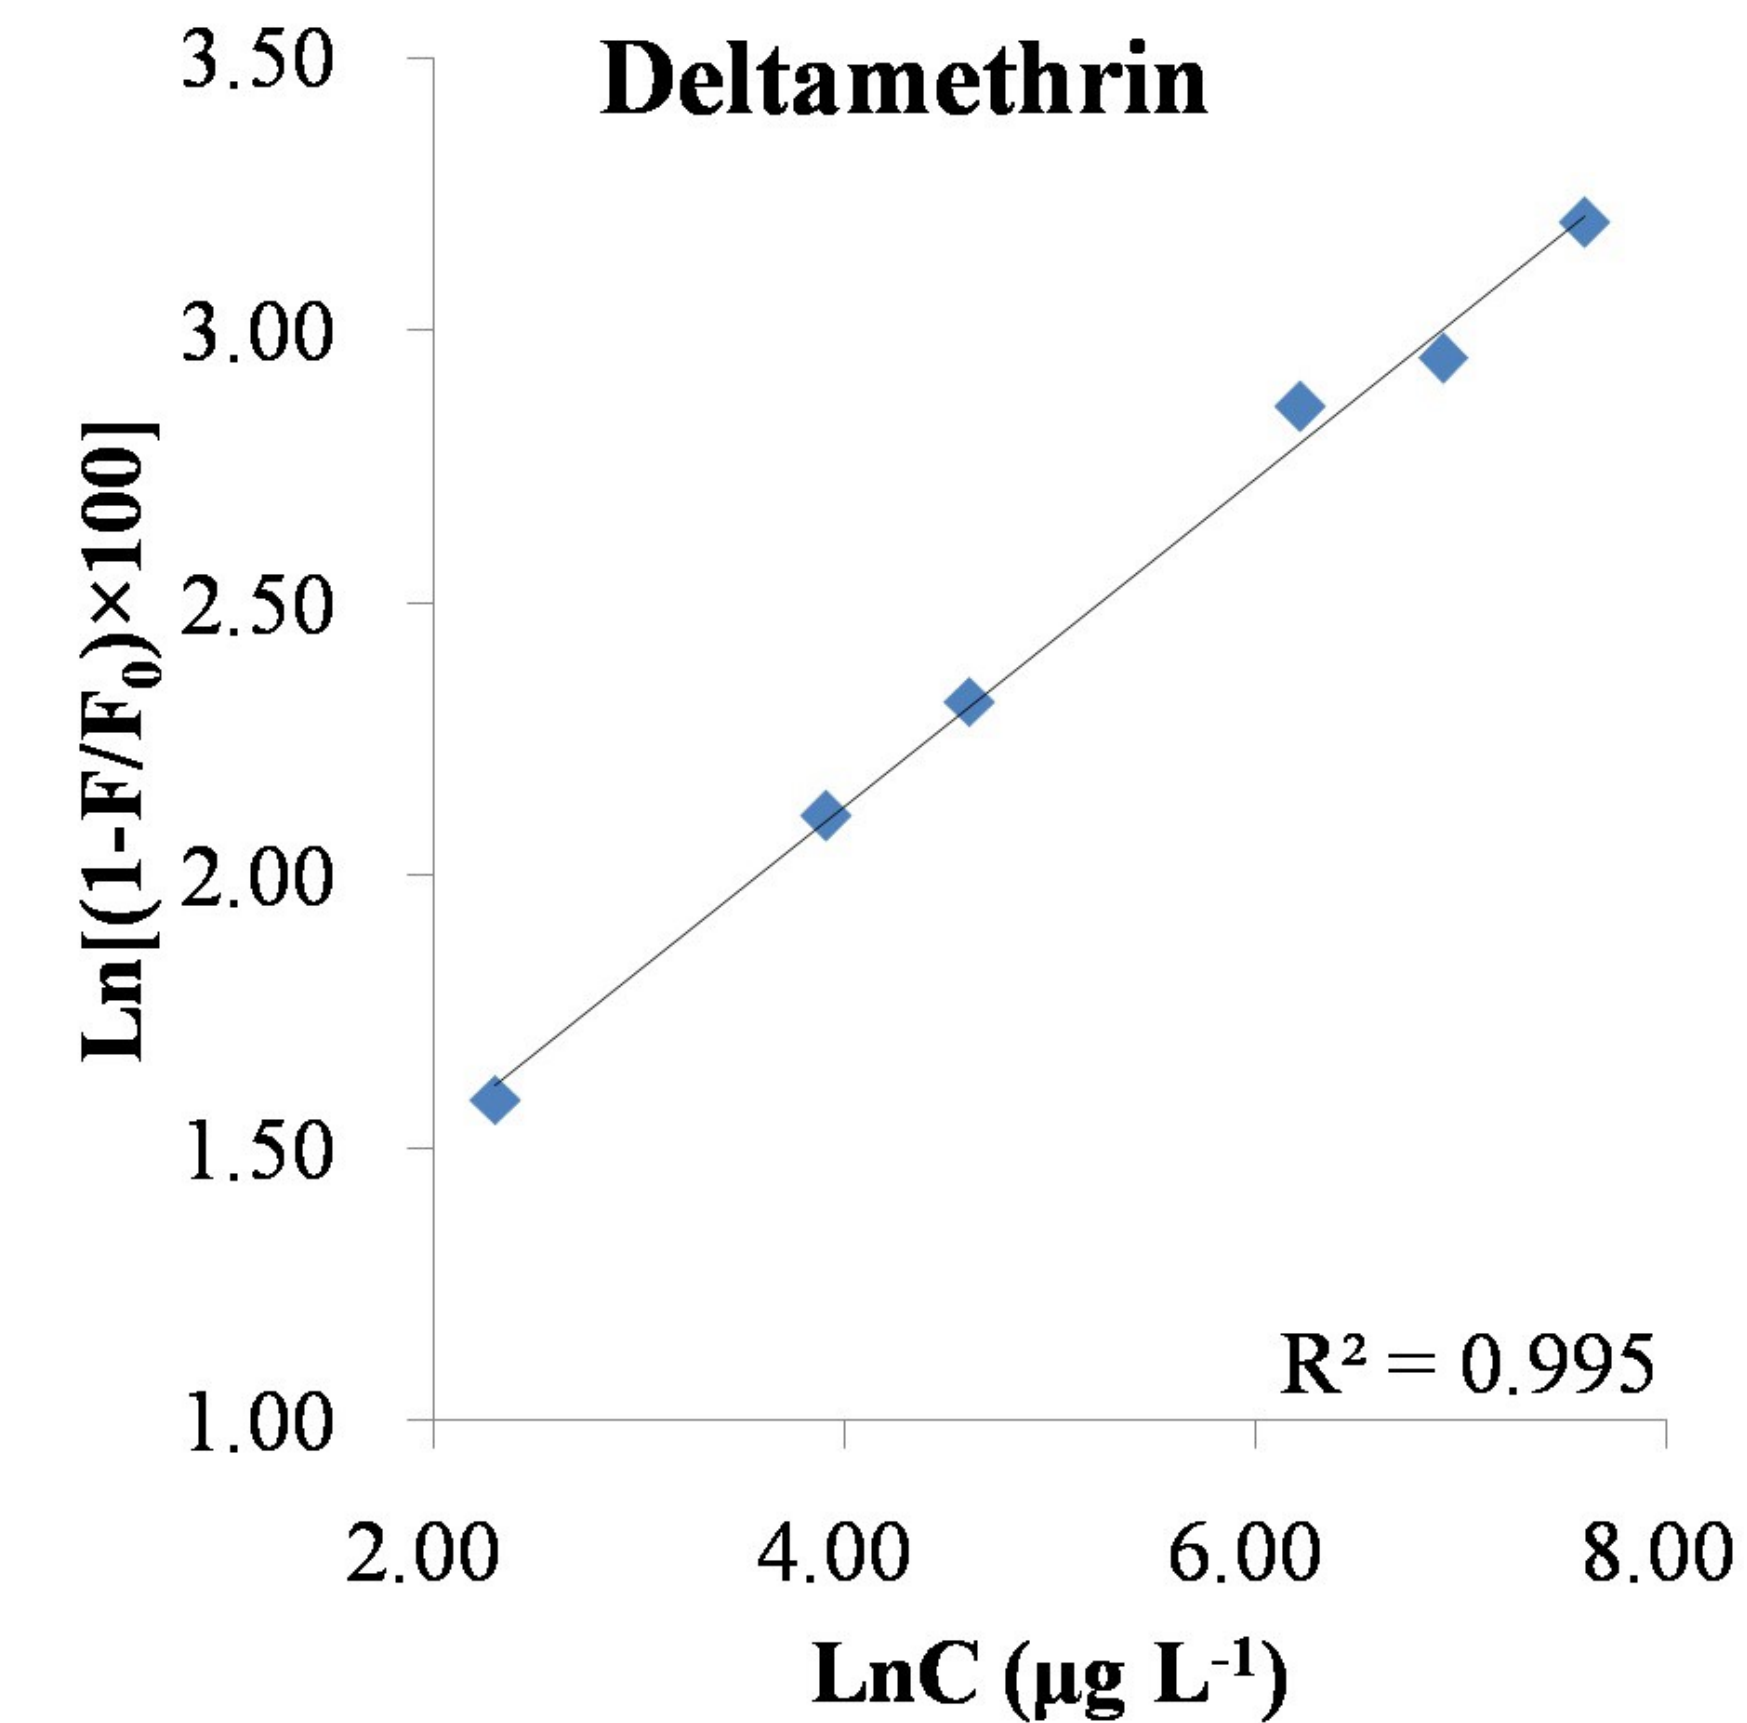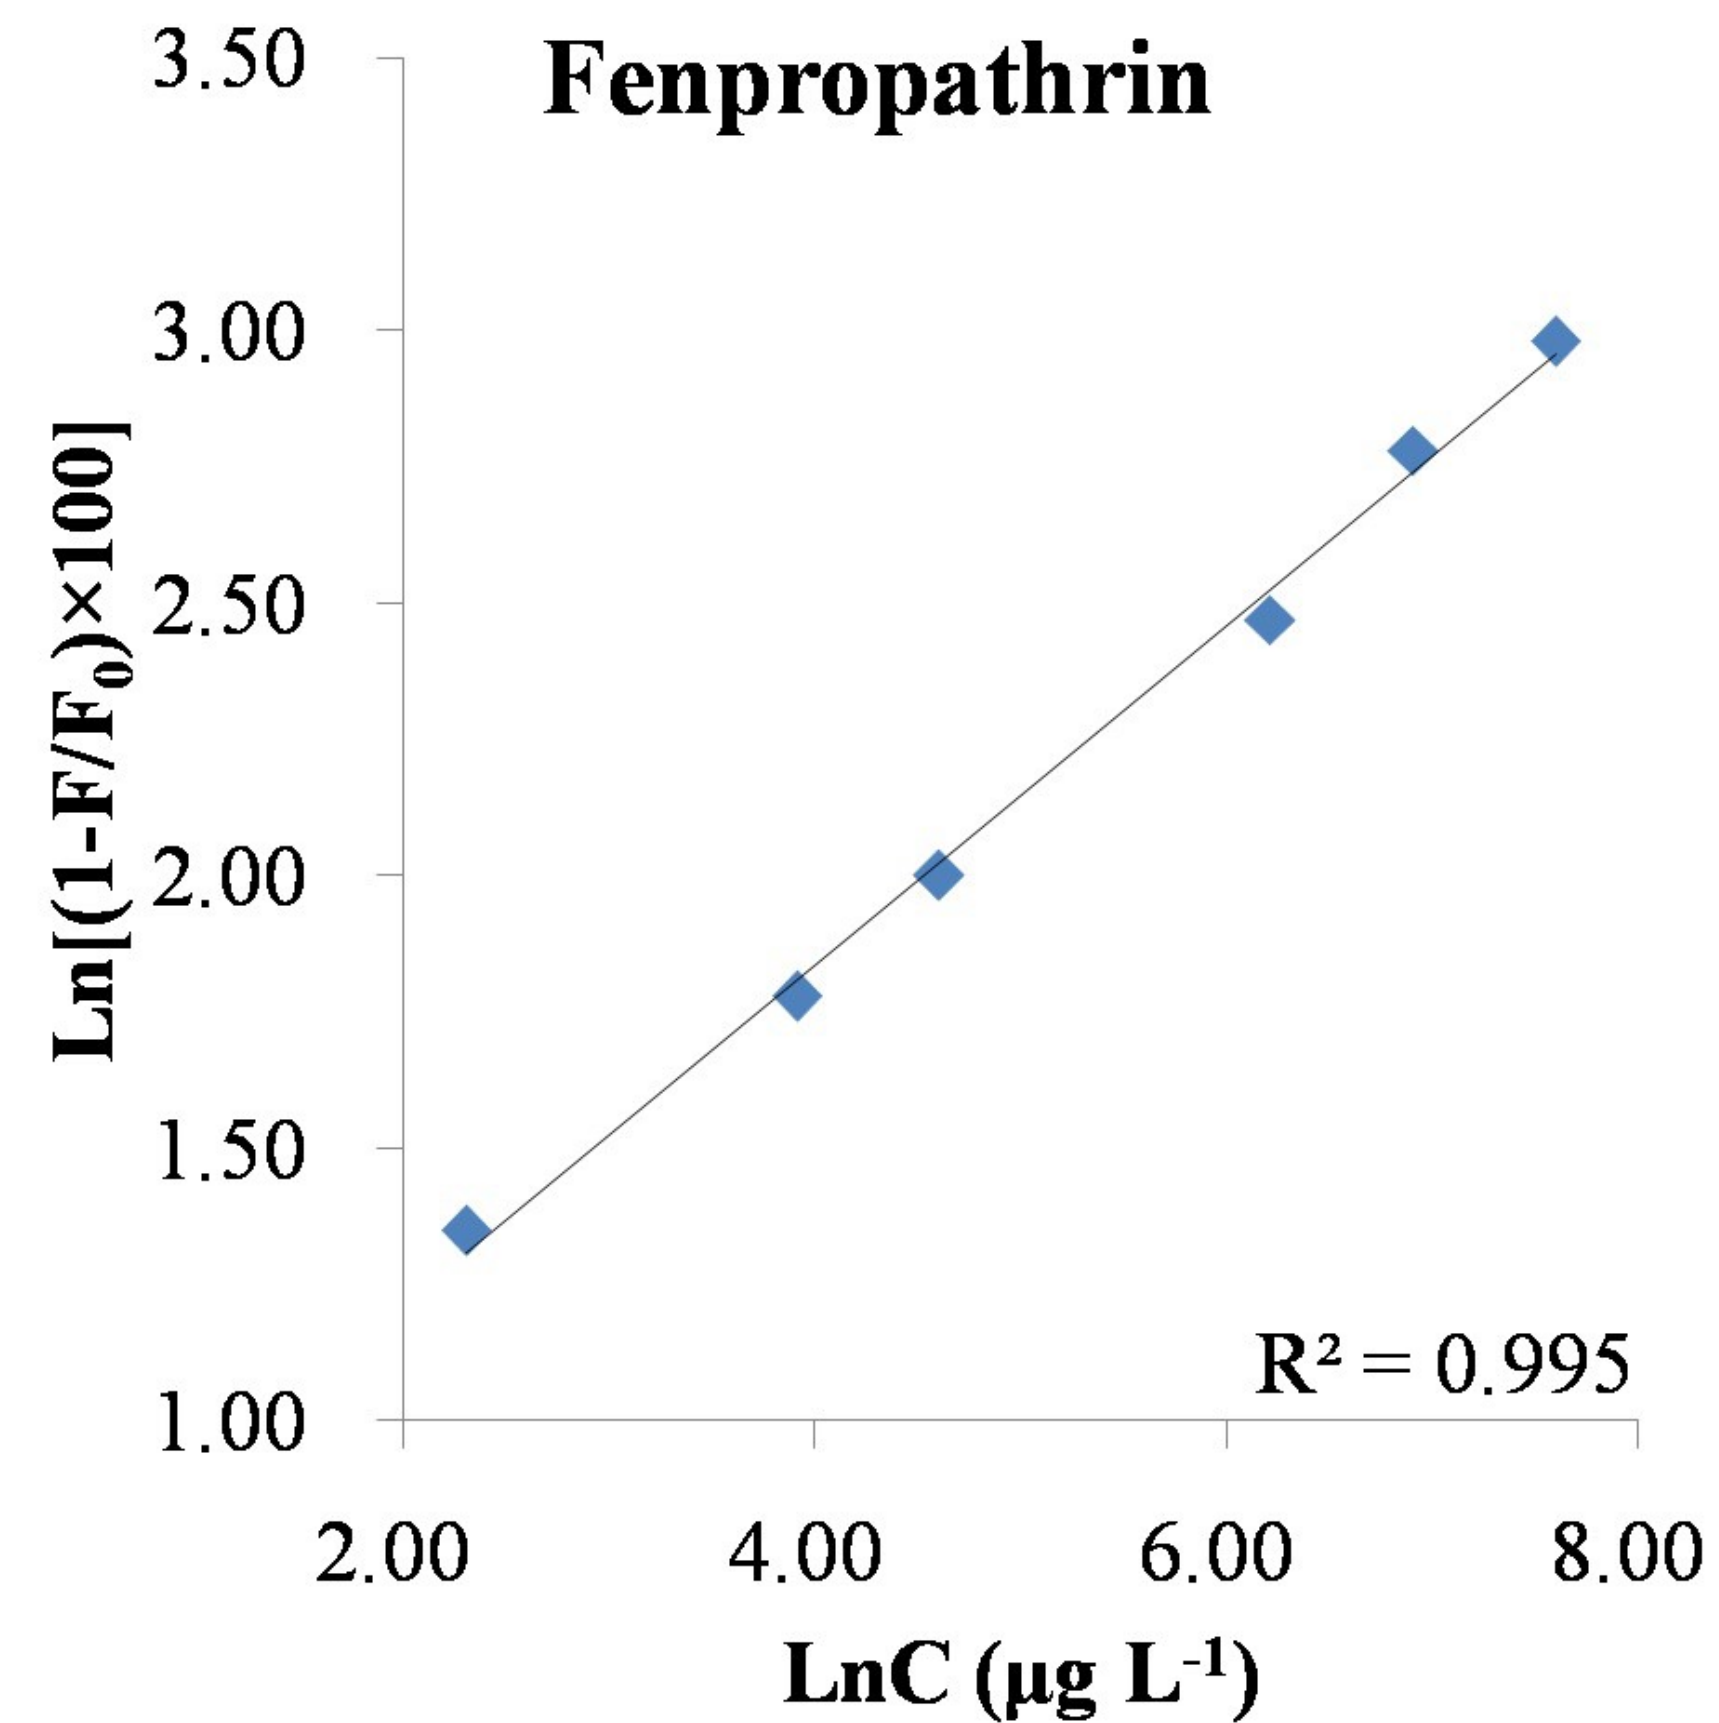

Supplement: d3nj00465a5.pdf [file d3nj00465a5.pdf]
